# Supplementary material for: Reduced uremic metabolites are prominent feature of sarcopenia, distinct from antioxidative markers for frailty
Source: PubMed Central journal article supplement (PMC8457568; doi:10.18632/aging.203498), 2021-09-07
Supplement: aging-13-203498-s002.pdf [file aging-13-203498-s002.pdf]

## SUPPLEMENTARY TABLES

**Supplementary Table 1. Clinical parameters of human subjects.**

|                            | Sarcopenia<br>(N = 6) | Non-<br>Sarcopenia<br>(N = 13) | 95% CI<br>of the<br>difference | P-value | Reduced SMI<br>(N = 11) | Control<br>(N = 8) | 95% CI<br>of the<br>difference | p-value  |
|----------------------------|-----------------------|--------------------------------|--------------------------------|---------|-------------------------|--------------------|--------------------------------|----------|
| Age                        | 85.0 ± 8.6            | 83.8 ± 6.3                     | -7.92 to 10.38                 | 0.76    | 85.0 ± 8.6              | 83.8 ± 6.3         | -7.92 to 10.38                 | 0.76     |
| Gender (Male; Female)      | 1;5                   | 6;7                            |                                |         | 2;9                     | 5;3                |                                |          |
| SMI (kg/m <sup>2</sup> )   | 5.0 ± 1.0             | 6.6 ± 1.2                      | -2.77 to -0.48                 | *0.01   | 5.2 ± 0.9               | 7.4 ± 0.8          | -2.99 to -1.31                 | **0.0005 |
| Handgrip(kg)               | 18.0 ± 4.0            | 23.0 ± 7.4                     | -10.53 to 0.66                 | 0.08    | 21.1 ± 5.4              | 23.4 ± 8.4         | -10.89 to 4.0                  | 0.51     |
| TUG(sec.)                  | 23.5 ± 13.3           | 12.2 ± 6.5                     | -2.68 to 25.26                 | 0.1     | 18.1 ± 11.4             | 12.6 ± 8.3         | -4.10 to 14.95                 | 0.27     |
| Walking Speed (m/sec.)     | 1.07 ± 0.33           | 1.21 ± 0.40                    | -0.61 to 0.33                  | 0.53    | 1.09 ± 0.26             | 1.27 ± 0.48        | -0.57 to 0.21                  | 0.37     |
| BMI(kg/m <sup>2</sup> )    | 20.0 ± 2.3            | 23.3 ± 3.6                     | -6.15 to -0.33                 | *0.03   | 20.7 ± 2.2              | 24.4 ± 4.0         | -7.20 to -0.26                 | *0.04    |
| Fat mass (kg)              | 12.7 ± 2.9            | 15.4 ± 5.7                     | -7.98 to 2.59                  | 0.19    | 13.4 ± 2.7              | 16.0 ± 7.2         | -7.60 to 2.33                  | 0.35     |
| Calf circumference(cm)     | 29.5 ± 4.1            | 33.5 ± 3.2                     | -7.65 to -0.42                 | *0.03   | 30.1 ± 3.1              | 35.3 ± 2.5         | -8.12 to -2.42                 | **0.001  |
| MoCA-J                     | 18.2 ± 3.8            | 22.2 ± 4.8                     | -8.40 to 0.42                  | 0.07    | 20.5 ± 4.3              | 21.5 ± 5.6         | -6.17 to 4.08                  | 0.66     |
| Systolic BP(mmHg)          | 140.5 ± 10.4          | 136.5 ± 18.2                   | -9.95 to 18.03                 | 0.55    | 143.9 ± 13.7            | 129.3 ± 14.2       | 0.40 to 28.92                  | *0.04    |
| Diastolic BP(mmHg)         | 77.7 ± 6.8            | 77.3 ± 14.4                    | -9.89 to 10.61                 | 0.94    | 77.2 ± 13.7             | 77.8 ± 10.1        | -12.49 to 11.36                | 0.92     |
| iADL                       | 3.7 ± 3.1             | 2.0 ± 2.3                      | -1.05 to 4.38                  | 0.28    | 2.7 ± 2.7               | 2.3 ± 2.7          | -2.19 to 3.14                  | 0.71     |
| CRE □ mg/dl □              | 0.61 ± 0.22           | 0.92 ± 0.28                    | -0.57 to 0.06                  | *0.02   | 0.68 ± 0.23             | 1.03 ± 0.25        | -0.59 to -0.11                 | **0.008  |
| BUN □ mg/dl □              | 15.8 ± 4.8            | 19.7 ± 6.4                     | -9.67 to 1.75                  | 0.16    | 15.6 ± 3.8              | 22.4 ± 6.6         | -12.59 to -1.03                | *0.025   |
| CK □ U/L □                 | 81.7 ± 24.6           | 124.4 ± 49.7                   | -77.50 to -7.33                | *0.03   | 103.1 ± 54.2            | 121.3 ± 33.4       | -59.69 to 23.62                | 0.39     |
| AST (U/L □                 | 20.8 ± 2.5            | 22.8 ± 4.8                     | -5.46 to 1.59                  | 0.26    | 22.9 ± 4.7              | 21.1 ± 3.6         | -2.20 to 5.77                  | 0.36     |
| ALT (U/L □                 | 12.5 ± 4.5            | 14.6 ± 5.4                     | -7.27 to 3.04                  | 0.39    | 13.8 ± 5.3              | 14.1 ± 5.3         | -5.53 to 4.92                  | 0.90     |
| γGTP (U/L □                | 19.7 ± 5.9            | 32.3 ± 19.5                    | -25.21 to -0.07                | *0.05   | 21.3 ± 5.4              | 38.0 ± 23.3        | -36.32 to 2.87                 | 0.08     |
| HDL □ mg/dl □              | 77.0 ± 18.0           | 59.9 ± 17.4                    | -2.67 to 36.82                 | 0.08    | 66.5 ± 18.9             | 63.8 ± 20.2        | -16.82 to 22.23                | 0.77     |
| LDL □ mg/dl □              | 113.5 ± 17.5          | 119.8 ± 28.9                   | -29.19 to 16.50                | 0.56    | 116.5 ± 21.6            | 119.6 ± 31.6       | -31.36 to 25.21                | 0.82     |
| Hba1c (%)                  | 5.6 ± 0.4             | 5.9 ± 0.5                      | -0.72 to 0.12                  | 0.15    | 5.7 ± 0.3               | 6.0 ± 0.6          | -0.81 to 0.22                  | 0.20     |
| Alb □ g/dl □               | 3.9 ± 0.3             | 3.8 ± 0.2                      | -0.25 to 0.42                  | 0.57    | 3.9 ± 0.3               | 3.8 ± 0.3          | -0.18 to 0.34                  | 0.53     |
| Glu □ mg/dl □              | 96.7 ± 11.5           | 100.4 ± 17.6                   | -18.22 to 10.78                | 0.59    | 101.6 ± 18.5            | 95.9 ± 11.2        | -8.70 to 20.22                 | 0.41     |
| TG □ mg/dl □               | 83.7 ± 53.9           | 134.4 ± 81.9                   | -118.38 to 16.94               | 0.13    | 118.9 ± 73.6            | 117.6 ± 85.8       | -79.46 to 82.03                | 0.97     |
| WBC □ 10 <sup>9</sup> /L □ | 4.4 ± 1.0             | 5.5 ± 1.6                      | -2.37 to 0.21                  | 0.09    | 4.7 ± 1.2               | 5.7 ± 1.8          | -2.61 to 0.62                  | 0.20     |
| RBC □ 10 <sup>12</sup> /L) | 4.0 ± 0.2             | 4.2 ± 0.3                      | -0.43 to 0.15                  | 0.31    | 4.2 ± 0.3               | 4.2 ± 0.4          | -0.37 to 0.31                  | 0.83     |
| Hb □ g/dl □                | 12.7 ± 0.7            | 12.8 ± 0.8                     | -0.90 to 0.67                  | 0.75    | 12.8 ± 0.7              | 12.7 ± 0.9         | -0.68 to 0.99                  | 0.70     |
| HCT □ % □                  | 39.3 ± 2.4            | 37.9 ± 2.9                     | -1.29 to 4.17                  | 0.27    | 38.6 ± 2.6              | 38.0 ± 3.1         | -2.27 to 3.48                  | 0.66     |
| Plt □ 10 <sup>9</sup> /L □ | 238.2 ± 24.9          | 206 ± 53.9                     | -5.99 to 70.32                 | 0.09    | 217.5 ± 38.1            | 214.4 ± 62.9       | -52.19 to 58.34                | 0.90     |

In addition to clinical features derived from sarcopenia diagnosis, 19 participants were statistically analyzed by SMI. Comparison between the sarcopenia and non-sarcopenia groups detected significant decreases in SMI (5.0 ± 1.0 vs 6.6 ± 1.2 kg/m<sup>2</sup>,  $p < 0.05$ ), Body Mass Index (BMI) (20.0 ± 2.3 U/L vs 23.3 ± 3.6 kg/m<sup>2</sup>,  $p < 0.05$ ), serum creatinine (0.61 ± 0.22 vs 0.92 ± 0.28 mg/dl,  $p < 0.05$ ), serum creatine kinase (CK) (81.7 ± 24.6 vs 124.4 ± 49.7 U/L,  $p < 0.05$ ) and serum γGTP (19.7 ± 5.9 vs 32.3 ± 19.5 U/L,  $p < 0.05$ ) in sarcopenia. A comparison between decreased and normal SMI groups detected significant decreases in SMI (5.2 ± 0.9 vs 7.4 ± 0.8 kg/m<sup>2</sup>,  $p < 0.01$ , BMI (20.7 ± 2.2 vs 24.4 ± 4.0 kg/m<sup>2</sup>,  $p < 0.05$ ), serum creatinine (0.68 ± 0.23 vs 1.03 ± 0.25 mg/dl,  $p < 0.01$ ) and serum BUN (15.6 ± 3.8 vs 22.4 ± 6.6 mg/dl,  $p < 0.05$ ) and a significant increase in systolic blood pressure (143.9 ± 13.7 vs 129.3 ± 14.2 mmHG,  $p < 0.05$ ). Asterisks indicate significant differences (\* $p < 0.05$ ). Asterisks indicate significant differences (\*\* $p < 0.01$ ). Abbreviation: SMI: skeletal muscle mass index; MoCA-J: Japanese version of Montreal Cognitive Assessment; TUG: Timed up and go test; BMI: Body mass index; BP: Blood pressure; CRE: creatinine; BUN, Blood urea nitrogen; CK: creatine kinase; HCT: hematocrit; CI: Confidence Interval.

**Supplementary Table 2. List of 22 metabolites involved in sarcopenia.**

| Parameters               | Peak area (10 <sup>6</sup> AU) |                 | T test             |         |
|--------------------------|--------------------------------|-----------------|--------------------|---------|
|                          | Sarcopenia                     | Non-sarcopenia  | 95% CI of the dif. | p-value |
|                          | (N = 6)                        | (N = 13)        |                    |         |
| Acetyl-carnitine         | 337.73 ± 76.94                 | 433.23 ± 99.79  | -186.23 to -4.77   | *0.040  |
| Dimethyl-proline         | 186.23 ± 91.05                 | 313.38 ± 102.26 | -230.09 to -24.20  | *0.020  |
| Phenylalanine            | 225.19 ± 55.70                 | 287.35 ± 40.46  | -121.27 to -3.07   | *0.042  |
| Dimethyl-arginine        | 38.92 ± 4.67                   | 50.22 ± 13.03   | -19.94 to -2.66    | *0.013  |
| N1-Methyl-histidine      | 21.75 ± 8.25                   | 37.39 ± 12.08   | -25.82 to -5.44    | **0.005 |
| Isovaleryl-carnitine     | 14.24 ± 3.85                   | 20.57 ± 7.7     | -11.95 to -0.71    | *0.033  |
| Aspartate <sup>(↑)</sup> | 22.91 ± 5.65                   | 13.64 ± 7.84    | 2.44 to 16.09      | *0.011  |
| myo-Inositol             | 13.95 ± 1.58                   | 20.30 ± 7.43    | -10.98 to -1.72    | *0.011  |
| Creatinine               | 15.60 ± 4.82                   | 21.48 ± 6.64    | -11.70 to -0.08    | *0.047  |
| Pantothenate             | 10.14 ± 3.09                   | 17.20 ± 8.03    | -12.47 to -1.65    | *0.013  |
| Hypoxanthine             | 4.11 ± 1.36                    | 7.58 ± 4.95     | -6.62 to -0.31     | *0.033  |
| Dimethyl-guanosine       | 2.50 ± 0.74                    | 3.95 ± 0.81     | -2.29 to -0.62     | **0.003 |
| N1-Methyl-adenosine      | 2.36 ± 1.07                    | 3.64 ± 1.08     | -2.47 to -0.10     | *0.036  |
| 2-Oxoglutarate           | 2.01 ± 0.49                    | 3.01 ± 1.1      | -1.76 to -0.23     | *0.018  |
| Pentose-phosphate        | 2.13 ± 0.24                    | 2.71 ± 0.75     | -1.07 to -0.09     | *0.022  |
| Succinate                | 1.33 ± 0.18                    | 1.74 ± 0.45     | -0.71 to -0.10     | *0.012  |
| N-Acetyl-glutamate       | 0.42 ± 0.14                    | 0.58 ± 0.12     | -0.31 to -0.01     | *0.037  |
| Quinolinic acid          | 0.26 ± 0.14                    | 0.50 ± 0.24     | -0.43 to -0.06     | *0.013  |
| 4-Guanidinobutanoate     | 0.16 ± 0.06                    | 0.55 ± 0.60     | -0.76 to -0.03     | *0.035  |
| N1-Methyl-guanosine      | 0.21 ± 0.09                    | 0.32 ± 0.10     | -0.21 to -0.01     | *0.038  |
| Trimethyl-tyrosine       | 0.05 ± 0.04                    | 0.17 ± 0.17     | -0.23 to -0.02     | *0.027  |
| cis-Aconitate            | 0.05 ± 0.02                    | 0.12 ± 0.05     | -0.10 to -0.04     | **0.000 |

Metabolite peak area. High > 10<sup>8</sup> AU. Medium 10<sup>7</sup>–10<sup>8</sup> AU. Low < 10<sup>7</sup> AU. 21 sarcopenia markers (acetyl-carnitine, dimethyl-proline, phenylalanine, dimethyl-arginine, N1-methyl-histidine, isovaleryl-carnitine, myo-inositol, creatinine, pantothenate, hypoxanthine, dimethyl-guanosine, N1-methyl-adenosine, 2-oxoglutarate, pentose-phosphate, succinate, N-acetyl-glutamate, quinolinic acid, 4-guanidinobutanoate, N1-methyl-guanosine, trimethyl-tyrosine, and cis-aconitate) decreased significantly. However, aspartate increased significantly in sarcopenia. Abbreviations: SMI: skeletal muscle index; CI: Confidence Interval. (↑) indicates upregulated metabolite in sarcopenia. Asterisks indicate significant differences (\*p < 0.05). Asterisks indicate significant differences (\*\*p < 0.01).

**Supplementary Table 3. List of ten metabolites involved in muscle mass.**

|                      | Peak area (10 <sup>6</sup> AU) |                | T test             |         |
|----------------------|--------------------------------|----------------|--------------------|---------|
|                      | Decreased SMI                  | Normal SMI     | 95% CI of the dif. | p-value |
|                      | (N = 11)                       | (N = 8)        |                    |         |
| Urate                | 95.24 ± 21.23                  | 114.54 ± 1.64  | -38.18 to -0.41    | *0.046  |
| Butyro-betaine       | 88.02 ± 19.93                  | 108.91 ± 19.46 | -40.32 to -1.47    | *0.037  |
| Dimethyl-arginine    | 40.23 ± 11.17                  | 55.48 ± 7.04   | -24.09 to -6.40    | **0.002 |
| N1-Methyl-histidine  | 24.73 ± 9.48                   | 43.07 ± 9.55   | -27.77 to -8.93    | **0.001 |
| Isovaleryl-carnitine | 14.47 ± 3.12                   | 24.21 ± 7.76   | -16.34 to -3.14    | **0.009 |
| Creatinine           | 16.89 ± 6.31                   | 23.38 ± 5.27   | -12.12 to -0.86    | *0.026  |
| Hippurate            | 12.92 ± 8.00                   | 26.70 ± 13.19  | -25.37 to -2.19    | *0.020  |
| Dimethyl-guanosine   | 2.98 ± 0.92                    | 4.20 ± 0.74    | -2.03 to -0.41     | **0.005 |
| 2-Oxoglutarate       | 2.15 ± 0.53                    | 3.45 ± 1.14    | -2.27 to -0.32     | *0.014  |
| cis-Aconitate        | 0.07 ± 0.04                    | 0.14 ± 0.05    | -0.11 to -0.27     | **0.004 |

Metabolite peak area. High > 10<sup>8</sup> AU, Medium 10<sup>7</sup>–10<sup>8</sup> AU, Low < 10<sup>7</sup> AU. 10 metabolites (urate, butyro-betaine, dimethyl-arginine, N1-methyl-histidine, isovaleryl-carnitine, creatinine, hippurate, dimethyl-guanosine, 2-oxoglutarate, cis-aconitate) decreased significantly in sarcopenia. Abbreviations: SMI: skeletal muscle index; CI: Confidence Interval. Asterisks indicate significant differences (\**p* < 0.05). Asterisks indicate significant differences (\*\**p* < 0.01).

**Supplementary Table 4. Correlation analysis between 25 sarcopenia-related markers and SMI or EFS.**

| Parameters               | SMI   |                 |         | EFS   |                |         |
|--------------------------|-------|-----------------|---------|-------|----------------|---------|
|                          | R     | 95% CI          | p value | R     | 95% CI         | p value |
| Isovaleryl-carnitine     | 0.70  | 0.37 to 0.88    | **0.001 | -0.55 | -0.80 to -0.12 | *0.015  |
| Urate                    | 0.58  | 0.18 to 0.82    | **0.008 | -0.54 | 0.10 to 0.79   | *0.02   |
| Hippurate                | 0.60  | 0.21 to 0.83    | **0.006 | -0.46 | -0.76 to -0.01 | *0.05   |
| Phenylalanine            | 0.40  | -0.07 to 0.72   | 0.09    | -0.45 | -0.75 to 0.00  | 0.05    |
| Butyro-betaine           | 0.5   | 0.06 to 0.78    | *0.029  | -0.44 | -0.75 to 0.01  | 0.05    |
| Acetyl-carnitine         | 0.55  | 0.12 to 0.80    | *0.02   | -0.43 | -0.74 to 0.03  | 0.06    |
| N1-Methyl-guanosine      | 0.65  | 0.27 to 0.85    | **0.003 | -0.39 | -0.71 to 0.08  | 0.10    |
| Pantothenate             | 0.62  | 0.23 to 0.84    | **0.005 | -0.36 | -0.70 to 0.11  | 0.13    |
| N1-Methyl-histidine      | 0.58  | 0.17 to 0.82    | **0.009 | -0.3  | -0.66 to 0.18  | 0.22    |
| Hypoxanthine             | 0.52  | 0.09 to 0.79    | *0.02   | -0.29 | -0.65 to 0.18  | 0.22    |
| Dimethyl-guanosine       | 0.62  | 0.23 to 0.84    | **0.005 | -0.28 | -0.65 to 0.20  | 0.25    |
| Dimethyl-arginine        | 0.55  | 0.12 to 0.80    | *0.02   | -0.27 | -0.64 to 0.20  | 0.26    |
| Creatinine               | 0.69  | 0.35 to 0.87    | **0.001 | -0.25 | -0.63 to 0.23  | 0.31    |
| Dimethyl-proline         | 0.24  | -0.24 to 0.63   | 0.32    | -0.25 | -0.63 to 0.23  | 0.31    |
| N-Acetyl-glutamate       | 0.41  | -0.05 to 0.73   | 0.08    | -0.21 | -0.60 to 0.26  | 0.38    |
| Quinolinic acid          | 0.36  | -0.11 to 0.70   | 0.13    | -0.19 | -0.59 to 0.28  | 0.44    |
| 2-Oxoglutarate           | 0.65  | 0.27 to 0.85    | **0.003 | -0.17 | -0.58 to 0.31  | 0.49    |
| Trimethyl-tyrosine       | 0.28  | -0.20 to 0.65   | 0.24    | -0.17 | -0.58 to 0.30  | 0.47    |
| Aspartate <sup>(1)</sup> | -0.45 | -0.75 to -0.001 | 0.05    | -0.17 | -0.30 to 0.58  | 0.48    |
| cis-Aconitate            | 0.57  | 0.16 to 0.82    | *0.01   | -0.16 | -0.57 to 0.32  | 0.52    |
| Succinate                | 0.59  | 0.19 to 0.82    | **0.008 | -0.12 | -0.54 to 0.36  | 0.63    |
| Pentose-phosphate        | 0.31  | -0.17 to 0.67   | 0.20    | -0.11 | -0.53 to 0.36  | 0.65    |
| 4-Guanidinobutanoate     | 0.20  | -0.27 to 0.60   | 0.41    | -0.1  | -0.53 to 0.37  | 0.68    |
| N1-Methyl-adenosine      | 0.37  | -0.10 to 0.71   | 0.12    | -0.07 | -0.52 to 0.40  | 0.76    |
| myo-Inositol             | 0.52  | 0.09 to 0.79    | *0.02   | -0.04 | -0.48 to 0.42  | 0.88    |

Metabolite peak area. High > 10<sup>8</sup> AU. Medium 10<sup>7</sup>–10<sup>8</sup> AU. Low < 10<sup>7</sup> AU. Metabolites are ordered according to its correlation coefficient to EFS. Abbreviations: SMI: skeletal muscle index; Pearson: Pearson's correlation coefficient between a metabolite and SMI; CI: Confidence Interval; EFS: Edmonton frail scale. Asterisks indicate correlation (\**p* < 0.05). Asterisks indicate correlation (\*\**p* < 0.01).

**Supplementary Table 5. Correlation analysis between 22 frailty-related markers and SMI or EFS.**

|                               | SMI   |               |         | EFS   |                |         |
|-------------------------------|-------|---------------|---------|-------|----------------|---------|
|                               | R     | 95% CI        | p value | R     | 95% CI         | p value |
| <i>Isovaleryl-carnitine</i>   | 0.70  | 0.37 to 0.88  | **0.001 | -0.54 | -0.80 to -0.12 | *0.015  |
| <i>Acetyl-carnosine</i>       | 0.69  | 0.35 to 0.87  | **0.001 | -0.51 | 0.07 to 0.78   | *0.03   |
| <i>Hippurate</i>              | 0.60  | 0.21 to 0.83  | **0.006 | -0.46 | 0.01 to 0.76   | *0.05   |
| <b>Urate</b>                  | 0.58  | 0.18 to 0.82  | **0.009 | -0.54 | 0.11 to 0.80   | *0.02   |
| <i>1,5-anhydroglucitol</i>    | 0.52  | 0.08 to 0.79  | *0.02   | -0.56 | 0.14 to 0.80   | *0.01   |
| <b>Proline</b>                | 0.49  | 0.05 to 0.77  | *0.03   | -0.54 | 0.11 to 0.80   | *0.02   |
| <i>Methionine</i>             | 0.46  | 0.01 to 0.76  | *0.046  | -0.56 | 0.14 to 0.80   | *0.01   |
| <i>Leucine</i>                | 0.46  | 0.01 to 0.75  | *0.046  | -0.46 | 0.01 to 0.75   | *0.04   |
| <i>N3-methyl-histidine</i>    | 0.45  | -0.01 to 0.74 | 0.05    | -0.19 | -0.59 to 0.29  | 0.43    |
| <i>Trimethyl-histidine</i>    | 0.44  | -0.01 to 0.75 | 0.057   | -0.39 | -0.08 to 0.71  | 0.10    |
| <i>Isoleucine</i>             | 0.42  | -0.04 to 0.74 | 0.07    | -0.45 | 0.14 to 0.80   | *0.04   |
| <b>Tryptophan</b>             | 0.37  | -0.09 to 0.71 | 0.12    | -0.57 | 0.15 to 0.82   | *0.01   |
| <b>Arginine</b>               | 0.36  | -0.11 to 0.70 | 0.13    | -0.32 | -0.15 to 0.67  | 0.17    |
| <b>Ergothioneine</b>          | 0.33  | -0.14 to 0.69 | 0.16    | -0.45 | 0.01 to 0.75   | 0.05    |
| <i>Adenine</i>                | 0.23  | -0.25 to 0.62 | 0.34    | -0.45 | -0.001 to 0.75 | 0.05    |
| <i>S-methyl-ergothioneine</i> | 0.22  | -0.26 to 0.61 | 0.37    | -0.51 | 0.07 to 0.78   | *0.02   |
| <i>Ophthalmic acid</i>        | 0.14  | -0.34 to 0.56 | 0.56    | -0.41 | -0.06 to 0.73  | 0.08    |
| <i>2-ketobutyrate</i>         | 0.14  | -0.33 to 0.56 | 0.56    | -0.29 | -0.19 to 0.66  | 0.24    |
| <i>UDP-glucose (↑)</i>        | 0.04  | -0.41 to 0.49 | 0.86    | -0.12 | -0.55 to 0.34  | 0.60    |
| <b>Creatine (↑)</b>           | -0.08 | -0.51 to 0.38 | 0.73    | 0.44  | -0.74 to 0.02  | 0.06    |
| <i>N-acetyl-aspartate (↑)</i> | -0.09 | -0.52 to 0.38 | 0.71    | 0.16  | -0.32 to 0.57  | 0.51    |
| <i>UDP-glucuronate (↑)</i>    | -0.15 | -0.56 to 0.32 | 0.54    | 0.47  | -0.76 to -0.02 | *0.04   |

Metabolite peak area. High > 10<sup>8</sup> AU. Medium 10<sup>7</sup>–10<sup>8</sup> AU. Low < 10<sup>7</sup> AU. Metabolites are ordered according to its correlation coefficient to SMI. Abbreviations: SMI: skeletal muscle index; Pearson: Pearson's correlation coefficient between a metabolite and SMI; CI: Confidence Interval. Asterisks indicate correlation (\*p < 0.05). Asterisks indicate correlation (\*\*p < 0.01).
