# Supplementary material for: Reduced uremic metabolites are prominent feature of sarcopenia, distinct from antioxidative markers for frailty
Source: Aging (Albany NY). 2021 Sep 7;13(17):20915–34. doi: 10.18632/aging.203498 (PMC8457568; doi:10.18632/aging.203498)
Supplement: Supplementary Data 1 [file aging-13-203498-s003.xlsx]

## Sheet: Sheet1
Supplementary Data 1. 131 identified metabolites were detected in whole blood samples by LC-MS. Abundance; Compound abundance (peak area) is indicated (High > 108 AU, 107 < Medium < 108 AU, Low < 107 AU). CV (coefficient of variation); Standard deviation/mean. See Supplementary Dataset 1
Compounds	Status	RT (min)	Detected m/z	Theoretical m/z	m/z error	Ionization	Abundance	Average Peak Area (All) (106 AU)	CV (All)	Average of metabolite peak area (Sarcopenia) (106 AU)	Average of metabolite peak area (Non-sarcopenia) (106 AU)	CV (Sarcopenia)	CV (Non-sarcopenia)	P-value	Average of metabolite peak area (Decreased SMI ) (106 AU)	Average of metabolite peak area (Normal SMI) (106 AU)	CV (Decreased SMI )	CV (Normal SMI)	P-value
(iso)Valeryl-carnitine	STD	5.61546	246.17	246.17	0.0936778	POS	Medium	18.5746	0.392692	14.2417	20.5744	0.270555	0.376171	0.0294972	14.4743	24.2125	0.215598	0.320319	0.00887039
1,5-Anhydroglucitol	STD	10.0128	163.061	163.061	0.038544	NEG	Medium	31.8164	0.39627	27.4683	33.8231	0.324534	0.40915	0.248547	29.0267	35.6521	0.493394	0.26116	0.23918
2-Aminobutyrate	STD	13.069	102.056	102.056	-2.7881	NEG	Low	2.58999	0.35905	2.77878	2.50286	0.296446	0.397216	0.537912	2.54874	2.64671	0.366601	0.372148	0.82988
2-Hydroxybutyrate	STD	4.72298	103.04	103.04	-3.57433	NEG	Low	9.09373	0.282248	9.26061	9.01671	0.141895	0.33533	0.809383	8.48747	9.92735	0.191068	0.346194	0.299322
2-Ketobutyrate	STD	3.98382	101.025	101.024	-4.02685	NEG	Low	0.173813	0.293017	0.19702	0.163102	0.323302	0.260606	0.272859	0.180885	0.164089	0.307952	0.275968	0.479161
2-Oxoglutarate	STD	14.3831	145.014	145.014	-0.406903	NEG	Low	2.69768	0.387704	2.01402	3.01322	0.242639	0.363517	0.0136922	2.15076	3.44971	0.247859	0.329313	0.0144436
3-Hydroxybutyrate	STD	5.56701	103.04	103.04	-3.68217	NEG	Low	8.85731	0.776489	8.56258	8.99335	0.560654	0.870482	0.884847	7.94868	10.1067	0.643386	0.891535	0.555284
4-Aminobenzoate	STD	7.544	138.054	138.055	3.62355	POS	Low	8.48241	1.71319	1.57954	11.6684	1.19266	1.43527	0.0521948	5.88212	12.0578	1.41392	1.69758	0.441553
4-Guanidinobutanoate	STD	14.9749	146.092	146.092	1.30379	POS	Low	0.427089	1.23516	0.155012	0.552664	0.356379	1.08875	0.0352953	0.255689	0.662765	0.880263	1.10214	0.166016
6-Phosphogluconate	STD	17.6771	275.017	275.017	2.67647	NEG	Low	2.07815	0.192258	2.00293	2.11286	0.165323	0.206101	0.554872	2.04295	2.12655	0.204925	0.185418	0.662688
Acetyl-carnitine	STD	9.20716	204.123	204.123	0.384633	POS	High	403.071	0.252566	337.728	433.23	0.227821	0.230347	0.0406086	377.751	437.887	0.254858	0.23969	0.221992
Acetyl-carnosine	STD	6.60677	269.124	269.124	0.452605	POS	Low	2.34047	0.711606	1.50413	2.72647	0.961924	0.611249	0.130837	1.7147	3.20091	0.735128	0.576179	0.0732316
Adenine	STD	6.94063	136.061	136.062	2.74938	POS	Low	2.61194	0.385917	2.27473	2.76758	0.487257	0.348283	0.373783	2.44359	2.84343	0.441509	0.32312	0.396917
Adenosine	STD	6.6238	268.104	268.104	1.51468	POS	Low	0.253808	0.340556	0.268066	0.247227	0.358422	0.343496	0.659826	0.261762	0.242872	0.367109	0.313129	0.638873
ADP	STD	15.2191	428.037	428.037	0.268041	POS	High	136.64	0.283257	155.661	127.862	0.397793	0.153475	0.327472	139.828	132.258	0.350345	0.148518	0.649961
AMP	STD	13.402	348.07	348.07	0.403867	POS	Medium	31.6134	0.232056	29.7353	32.4802	0.259164	0.224994	0.481287	31.1796	32.2099	0.231465	0.246969	0.776174
Arginine	STD	26.0185	175.119	175.119	1.06088	POS	High	217.765	0.110831	223.727	215.013	0.0792653	0.124513	0.414482	211.896	225.834	0.116142	0.0994194	0.217861
Asparagine	STD	14.6367	133.06	133.061	2.76488	POS	Medium	17.8399	0.168344	17.3153	18.0821	0.205037	0.157164	0.654338	16.748	19.3414	0.167277	0.14188	0.0615588
Aspartate	STD	14.3707	134.044	134.045	3.01557	POS	Medium	16.5702	0.502677	22.9102	13.644	0.246581	0.574296	0.011521	19.4644	12.5905	0.35855	0.699485	0.0904754
ATP	STD	16.432	508.003	508.003	0.451837	POS	High	432.538	0.141836	403.848	445.78	0.187491	0.115594	0.256778	413.977	458.059	0.14763	0.120697	0.120209
Betaine	STD	9.32945	118.086	118.086	3.4771	POS	High	432.144	0.212764	420.475	437.53	0.322753	0.16011	0.780826	422.136	445.905	0.247508	0.170344	0.573367
Butyro-betaine	STD	12.9107	146.117	146.118	2.33271	POS	Medium	96.8144	0.226384	86.7235	101.472	0.259498	0.205569	0.206882	88.0161	108.912	0.22648	0.178671	0.0366515
Butyryl-carnitine	STD	6.373	232.154	232.154	-0.120851	POS	Medium	25.5348	0.251094	23.8537	26.3107	0.201657	0.268638	0.390767	22.8969	29.1619	0.163674	0.264899	0.0617649
Caffeine	STD	3.9326	195.088	195.088	0.821821	POS	Medium	48.3258	1.02762	55.0774	45.2097	1.05421	1.05182	0.72518	54.6275	39.661	1.0262	1.04082	0.511738
Carnitine	STD	12.6583	162.112	162.113	1.90869	POS	High	740.255	0.189075	688.698	764.05	0.260685	0.154928	0.378978	711.321	780.039	0.219611	0.142689	0.278443
Carnosine	STD	15.7201	227.114	227.114	0.676703	POS	Low	0.234545	0.576475	0.19724	0.251762	0.407277	0.611695	0.325898	0.176071	0.314946	0.380768	0.529669	0.0540529
CDP-choline	STD	15.4438	489.114	489.115	0.55583	POS	Low	9.78171	0.476142	9.24318	10.0303	0.419211	0.50905	0.716914	9.22566	10.5463	0.431917	0.535905	0.581652
CDP-ethanolamine	STD	16.5252	445.053	445.053	1.18824	NEG	Low	1.00564	0.410765	1.07001	0.975938	0.310678	0.46606	0.62001	1.00943	1.00044	0.310365	0.546123	0.967479
Chenodeoxycholate	STD	3.39133	391.285	391.285	0.80267	NEG	Medium	13.4401	1.13458	7.18633	16.3265	0.988156	1.05947	0.121419	13.3314	13.5896	1.33317	0.891035	0.970411
cis-Aconitate	STD	17.3209	175.024	175.024	0.866785	POS	Low	0.0968072	0.548705	0.0488777	0.118928	0.41631	0.410302	0.000383521	0.0674704	0.137145	0.542917	0.336248	0.0036447
Citrate	STD	17.8422	191.019	191.02	1.22725	NEG	Medium	14.0954	0.156728	13.6686	14.2923	0.158356	0.16009	0.578692	13.4792	14.9427	0.150432	0.153463	0.171439
Citrulline	STD	15.8307	176.103	176.103	0.87319	POS	High	155.399	0.177192	141.629	161.755	0.213076	0.153848	0.190659	146.993	166.957	0.16095	0.178319	0.140432
Creatine	STD	14.2847	130.062	130.062	-1.1232	NEG	Medium	26.7899	0.322119	28.0263	26.2193	0.128406	0.391171	0.580103	27.1794	26.2545	0.281617	0.394419	0.834267
Creatinine	STD	7.15536	112.052	112.052	-2.83528	NEG	Medium	19.6249	0.337155	15.5963	21.4843	0.309304	0.309147	0.0474461	16.8912	23.3839	0.37383	0.225178	0.0263253
CTP	STD	18.037	481.977	481.977	0.251786	NEG	Low	1.30632	0.220739	1.22868	1.34215	0.179204	0.235751	0.381859	1.28877	1.33045	0.191691	0.266243	0.779817
Cytidine	STD	10.2483	244.093	244.093	0.00554022	POS	Low	6.35152	0.354136	5.95575	6.53419	0.428596	0.333884	0.643278	6.11328	6.67911	0.361982	0.360648	0.608907
Decanoyl-carnitine	STD	3.97269	316.248	316.248	0.500975	POS	Medium	22.6003	0.688107	22.6232	22.5897	0.809015	0.661348	0.996963	26.0899	17.802	0.712199	0.512411	0.218872
Dimethyl-arginine	STD	22.1601	203.15	203.15	0.465029	POS	Medium	46.6534	0.261115	38.922	50.2218	0.120108	0.259472	0.0134995	40.2337	55.4805	0.277649	0.126835	0.00206035
Dimethyl-guanosine	STD	6.231	312.13	312.13	0.187266	POS	Low	3.49309	0.296004	2.49746	3.95262	0.298104	0.203705	0.00286149	2.97947	4.19933	0.309967	0.175972	0.0053762
Dimethyl-lysine	STD	21.7729	175.144	175.144	0.836989	POS	Medium	14.7101	0.553953	13.9845	15.0451	0.354681	0.626932	0.752538	12.4836	17.7716	0.429526	0.593296	0.223356
Dimethyl-proline (stachydrine)	STD	8.48869	144.102	144.102	1.91854	POS	High	273.226	0.416685	186.231	313.377	0.488911	0.326325	0.0200025	238.017	321.637	0.469153	0.324448	0.113745
Dimethyl-xanthine	STD	4.56941	181.072	181.072	0.888915	POS	Medium	73.2907	0.697165	60.9128	79.0036	0.798692	0.67193	0.480107	76.0991	69.429	0.675801	0.776392	0.789771
Diphosphoglycerate	STD	18.2913	264.951	264.952	2.54465	NEG	High	471.368	0.163284	10.2939	10.6444	0.181227	0.133662	0.693812	10.2575	10.9134	0.171992	0.104353	0.339447
Dodecanoyl-carnitine	STD	3.81019	344.278	344.279	3.16061	POS	Low	3.26711	0.952804	3.29275	3.25527	1.02049	0.96315	0.982079	4.01527	2.23838	0.938038	0.715136	0.182683
Ergothioneine	STD	14.1651	230.096	230.096	0.170177	POS	High	583.886	0.551945	464.508	638.984	0.8264	0.453515	0.351762	518.124	674.308	0.657157	0.433153	0.298949
Fructose-1,6-diphosphate	STD	18.107	338.988	338.989	1.47157	NEG	Medium	59.544	0.122613	61.5188	58.6325	0.153941	0.10751	0.517834	59.5335	59.5584	0.14412	0.0948301	0.994016
Fructose-6-phosphate	STD	15.8673	259.022	259.022	0.927556	NEG	Low	8.97144	0.232336	9.62173	8.6713	0.292343	0.196769	0.470002	9.0211	8.90315	0.282551	0.154061	0.898347
GDP	STD	17.9275	442.017	442.017	0.698384	NEG	Low	7.62724	0.512797	9.85645	6.59838	0.655005	0.21154	0.273673	8.19424	6.84763	0.615529	0.195635	0.414582
GDP-glucose	STD	18.0834	604.07	604.07	0.156202	NEG	Medium	12.2912	0.344385	12.4862	12.2012	0.434285	0.313131	0.910668	12.1965	12.4214	0.357126	0.350338	0.912921
Gluconate	STD	12.7954	195.051	195.051	0.869806	NEG	Medium	48.1164	0.335379	47.2996	48.4935	0.236913	0.37901	0.863909	50.1929	45.2613	0.360082	0.302041	0.507523
Glucose	STD	13.9698	179.056	179.056	0.982232	NEG	Medium	76.3831	0.243193	76.104	76.5119	0.195637	0.269496	0.961743	75.6477	77.3942	0.226123	0.279304	0.852692
Glucose-6-phosphate	STD	16.8806	259.022	259.022	1.23491	NEG	Medium	18.7287	0.150346	19.239	18.4931	0.166971	0.147126	0.634546	18.3208	19.2895	0.182745	0.100441	0.438549
Glutamate	STD	13.9916	148.06	148.06	1.7144	POS	Medium	97.8698	0.243821	86.3599	103.182	0.370323	0.17637	0.271126	96.4743	99.7885	0.296531	0.170019	0.756378
Glutamine	STD	14.7008	145.062	145.062	0.432658	NEG	Medium	66.7117	0.174922	65.001	67.5013	0.106682	0.199906	0.601226	65.0549	68.9898	0.195317	0.151519	0.470069
Glutathione disulfide (GSSG)	STD	17.6685	613.159	613.159	0.388017	POS	High	684.503	0.174993	649.13	700.829	0.287469	0.111432	0.538802	662.16	715.225	0.206881	0.126791	0.324463
Glyceraldehyde-3-phosphate	STD	14.806	168.99	168.991	1.94661	NEG	Low	0.270125	0.34895	0.244735	0.281843	0.443191	0.316445	0.484625	0.273154	0.265959	0.348902	0.372925	0.876025
Glycerol-phosphate	STD	14.5782	171.006	171.006	0.709564	NEG	Medium	11.3504	0.340955	12.7136	10.7213	0.416933	0.28597	0.421555	11.3125	11.4027	0.406116	0.253484	0.95883
Glycerophosphocholine	STD	14.5622	258.11	258.11	0.0483549	POS	Medium	96.1135	0.390591	81.3931	102.908	0.237943	0.412205	0.147469	87.3607	108.149	0.452916	0.306893	0.231437
Glycochenodeoxycholate	STD	3.33573	448.307	448.307	-0.0262963	NEG	Low	5.70798	2.05324	2.62032	7.13305	0.702553	1.97095	0.276506	6.76487	4.25475	2.2053	1.3103	0.617525
GMP	STD	16.7515	362.05	362.051	0.779745	NEG	Low	0.818011	0.324596	0.919442	0.771197	0.464597	0.193221	0.44213	0.849749	0.774371	0.400412	0.142327	0.504494
GTP	STD	18.9776	521.984	521.983	-0.200362	NEG	Medium	47.5502	0.235876	46.5025	48.0338	0.262554	0.233487	0.800205	45.2434	50.7221	0.253008	0.212734	0.302939
HEPES [M+H]+	STD	6.90022	239.106	239.106	0.772085	POS	High	312.55	0.186941	303.799	316.589	0.312325	0.114483	0.760705	315.384	308.653	0.22239	0.134403	0.796916
HEPES [M-H]-	STD	6.905	237.091	237.091	1.36135	NEG	High	400.598	0.151452	401.315	400.268	0.155357	0.156051	0.973541	398.096	404.039	0.185572	0.100402	0.825332
Hexanoyl-carnitine	STD	4.94201	260.186	260.186	0.311273	POS	Low	8.80166	0.312704	8.10173	9.1247	0.341247	0.306469	0.472418	8.92988	8.62536	0.347583	0.275701	0.811647
Hippurate	STD	3.88305	180.065	180.065	0.762603	POS	Medium	18.7248	0.658584	16.3704	19.8114	0.548411	0.696638	0.526223	12.9219	26.7038	0.619199	0.493854	0.0240754
Histidine	STD	14.0626	156.076	156.077	2.17118	POS	Medium	98.1176	0.171691	95.9161	99.1337	0.247315	0.13819	0.766644	95.8643	101.216	0.207197	0.119854	0.477634
Hypoxanthine	STD	7.65706	137.046	137.046	2.01683	POS	Low	6.48058	0.683476	4.10571	7.57668	0.331539	0.65375	0.0331135	5.77101	7.45625	0.871239	0.473318	0.402663
IMP	STD	15.4941	347.04	347.04	0.710481	NEG	Low	3.3146	0.168687	3.28275	3.32929	0.0885878	0.197638	0.83326	3.28846	3.35053	0.170102	0.177664	0.821185
Indoxyl-sulfate	STD	4.42842	212.002	212.002	1.38271	NEG	Medium	35.8997	0.426454	36.1695	35.7752	0.504389	0.407801	0.964023	36.6907	34.8122	0.483707	0.352284	0.788333
Isoleucine	STD	9.49469	130.087	130.087	-0.278109	NEG	Medium	22.7895	0.234266	21.9997	23.154	0.302571	0.21086	0.714222	22.2882	23.4789	0.286274	0.160475	0.617613
Keto(iso)leucine	STD	3.36291	129.056	129.056	-1.6287	NEG	Medium	21.9963	0.260421	20.661	22.6126	0.273945	0.260012	0.505589	20.2335	24.4202	0.303748	0.17765	0.0998486
Ketovaline	STD	3.67868	115.04	115.04	-2.31626	NEG	Low	3.70784	0.226176	3.68127	3.72011	0.148209	0.259285	0.912541	3.43189	4.08728	0.216835	0.209493	0.104114
Kynurenine	STD	8.83785	209.092	209.092	0.881773	POS	Medium	15.3002	0.341278	12.3339	16.6693	0.417005	0.290479	0.114949	14.5353	16.352	0.381152	0.300092	0.461455
Leucine	STD	8.80187	130.087	130.087	-0.278109	NEG	Medium	49.9098	0.159506	47.7188	50.921	0.210652	0.138104	0.502646	49.0658	51.0702	0.199838	0.0938309	0.564954
Lysine	STD	25.0219	145.098	145.098	0.371918	NEG	Medium	38.8849	0.182772	37.5136	39.5178	0.214797	0.174106	0.611629	36.8356	41.7026	0.191264	0.157794	0.142127
Malate	STD	15.2138	133.014	133.014	-0.348847	NEG	Low	6.48927	0.186945	6.08512	6.67581	0.112826	0.20603	0.229265	6.21392	6.86788	0.17236	0.198722	0.280602
Methionine	STD	9.7855	150.058	150.058	1.76501	POS	Medium	85.6788	0.191032	80.0357	88.2834	0.319042	0.117109	0.475567	82.3085	90.313	0.22819	0.132188	0.273005
myo-Inositol	STD	16.797	179.056	179.056	0.982232	NEG	Medium	18.2942	0.373735	13.9484	20.3	0.113614	0.366235	0.0106767	15.6996	21.8618	0.234165	0.398177	0.0928775
N1-Methyl-adenosine	STD	13.0788	282.119	282.12	2.41545	POS	Low	3.23447	0.375516	2.35576	3.64003	0.454925	0.297165	0.036246	2.9899	3.57076	0.431787	0.305407	0.304304
N1-Methyl-guanosine	STD	7.70547	298.115	298.115	0.00843161	POS	Low	0.282152	0.36971	0.208877	0.315971	0.429735	0.300934	0.0383205	0.255917	0.318225	0.460408	0.234724	0.177507
N1-Methyl-histidine	STD	11.6025	170.092	170.092	1.45136	POS	Medium	32.452	0.404138	21.7549	37.3891	0.379413	0.323171	0.00534751	24.7262	43.075	0.383253	0.221761	0.000840337
N2-Acetyl-arginine	STD	14.8166	217.129	217.13	0.464353	POS	Low	1.89619	0.427877	1.55632	2.05306	0.489809	0.395962	0.224054	1.73761	2.11425	0.395533	0.454662	0.362699
N2-Acetyl-lysine	STD	15.0469	189.123	189.123	1.29889	POS	Low	1.08739	0.741199	0.730234	1.25224	0.429861	0.731955	0.0849917	0.808233	1.47124	0.329172	0.768518	0.144736
N3-Methyl-histidine	STD	12.46	170.092	170.092	1.45136	POS	Medium	29.9546	0.744085	25.5004	32.0103	1.1483	0.603679	0.63428	25.7703	35.7079	0.915862	0.571409	0.340997
N6-Acetyl-lysine	STD	12.4912	189.123	189.123	1.32695	POS	Low	3.58485	0.442651	2.9084	3.89705	0.59301	0.380888	0.257766	3.50654	3.69252	0.480686	0.418975	0.806464
N6-Methyl-lysine	STD	24.0965	161.128	161.129	1.65785	POS	Medium	23.1343	0.598424	16.8594	26.0304	0.449862	0.5886	0.0994067	19.6847	27.8774	0.493647	0.635169	0.263135
N-Acetyl-aspartate	STD	13.7583	174.041	174.041	0.453549	NEG	Low	0.594722	0.174136	0.591771	0.596084	0.0970978	0.20344	0.917461	0.58839	0.603429	0.168104	0.192216	0.771234
N-Acetyl-glucosamine	STD	10.2909	222.097	222.097	0.0426605	POS	Medium	36.352	0.234634	35.4053	36.789	0.23672	0.24191	0.749459	35.4155	37.6397	0.187231	0.29223	0.621344
N-Acetyl-glutamate	STD	13.1763	190.071	190.071	0.524567	POS	Low	0.533654	0.269368	0.423573	0.584461	0.326051	0.203837	0.037207	0.479787	0.607721	0.273881	0.21854	0.0546754
NAD+	STD	14.2507	664.116	664.116	0.8441	POS	Medium	35.7932	0.37589	35.0007	36.159	0.397971	0.381433	0.869258	36.8393	34.3549	0.365964	0.413431	0.706069
NADP+	STD	17.1255	744.082	744.083	0.631277	POS	Low	4.21487	0.21102	3.73778	4.43506	0.243119	0.185411	0.143951	4.12646	4.33642	0.236778	0.184662	0.614085
Nicotinamide	STD	4.99213	123.055	123.055	2.8344	POS	High	136.279	0.374342	133.899	137.377	0.400804	0.378209	0.897267	129.823	145.155	0.439309	0.299495	0.515137
Octanoyl-carnitine	STD	4.08894	288.217	288.217	0.0309439	POS	Medium	20.7682	0.485341	21.8019	20.291	0.559894	0.466321	0.795363	23.5693	16.9165	0.48101	0.411068	0.132906
Ophthalmic acid	STD	12.8034	290.134	290.135	0.875959	POS	Medium	13.6207	0.443052	13.7014	13.5835	0.565217	0.400749	0.974048	14.0361	13.0495	0.490475	0.385404	0.72257
Ornithine	STD	23.2672	131.083	131.083	-0.899399	NEG	Medium	16.9909	0.252717	16.9137	17.0265	0.341664	0.217684	0.966253	16.7471	17.3261	0.277743	0.232884	0.775892
Pantothenate	STD	5.22187	220.118	220.118	0.08129	POS	Medium	14.9705	0.504337	10.1409	17.1996	0.305109	0.466847	0.0135804	11.6444	19.5439	0.292148	0.482067	0.0518886
Pentose-phosphate	STD	15.6391	229.011	229.012	1.99076	NEG	Low	2.52755	0.271918	2.12958	2.71123	0.110772	0.278373	0.0226127	2.36099	2.75657	0.16685	0.342125	0.293352
Phenylalanine	STD	7.65302	166.086	166.086	1.27186	POS	High	267.722	0.198863	225.185	287.354	0.247369	0.140787	0.0415874	248.796	293.745	0.198266	0.169392	0.0697628
Phosphocholine	STD	15.0859	184.073	184.073	0.458239	POS	High	104.331	0.286888	90.0684	110.914	0.286193	0.273218	0.148803	99.9524	110.352	0.297416	0.282186	0.475285
Phosphocreatine	STD	14.9918	210.028	210.029	0.893444	NEG	Low	1.24776	0.32684	1.14673	1.29439	0.2402	0.354373	0.397823	1.18238	1.33766	0.278249	0.379048	0.464129
Phosphoenolpyruvate	STD	17.4539	166.975	166.975	0.506713	NEG	Low	1.30506	0.181385	1.31154	1.30207	0.123787	0.207561	0.925785	1.32471	1.27804	0.191854	0.175614	0.677759
Phosphoglycerate	STD	16.9106	184.985	184.986	1.57158	NEG	Medium	14.9808	0.181138	14.6382	15.139	0.154603	0.196235	0.692519	14.5748	15.539	0.166573	0.202484	0.482161
PIPES [M+H]+	STD	12.9518	303.068	303.068	0.349307	POS	Medium	46.8049	0.134023	44.6432	47.8026	0.208876	0.0920918	0.459202	45.4972	48.6029	0.156107	0.0981148	0.270355
PIPES [M-H]-	STD	13.0599	301.053	301.053	1.63803	NEG	High	108.603	0.0911909	108.829	108.499	0.105777	0.0883407	0.952687	109.341	107.589	0.0982263	0.0858897	0.708162
Proline	STD	11.6848	116.07	116.071	2.79702	POS	High	332.239	0.235433	293.001	350.349	0.254338	0.216222	0.152047	314.854	356.144	0.252627	0.209496	0.264001
Propionyl-carnitine	STD	7.51594	218.139	218.139	0.478681	POS	High	112.061	0.296454	105.12	115.264	0.241166	0.319056	0.49658	106.676	119.464	0.237565	0.356342	0.465238
Quinolinic acid	STD	14.1878	166.015	166.015	0.599383	NEG	Low	0.426339	0.566074	0.258457	0.503823	0.535646	0.481233	0.0130798	0.372443	0.500446	0.674991	0.440722	0.25608
S-Adenosyl-homocysteine	STD	13.537	385.129	385.129	0.12158	POS	Low	2.86823	0.354921	3.49143	2.5806	0.365603	0.298089	0.151464	3.06752	2.5942	0.409568	0.197179	0.2784
S-Adenosyl-methionine	STD	17.2431	399.145	399.144	-0.3732	POS	Low	0.359253	1.04749	0.190938	0.436938	1.32413	0.929889	0.128159	0.347648	0.375211	1.07059	1.08507	0.882062
Sedoheptulose-7-phosphate	STD	16.1949	289.033	289.033	1.44106	NEG	Low	3.04711	0.208369	3.19083	2.98077	0.173319	0.228069	0.48883	2.95284	3.17672	0.212463	0.209086	0.469524
Serine	STD	15.2755	106.049	106.05	4.01101	POS	Medium	39.7689	0.221076	37.8989	40.6319	0.296062	0.192116	0.605586	39.0121	40.8095	0.230162	0.22115	0.673572
S-Methyl-ergothioneine	STD	8.66451	244.111	244.111	0.00092185	POS	Medium	31.8326	0.634136	29.1425	33.0742	0.866203	0.557855	0.741856	30.2924	33.9504	0.740667	0.526751	0.697776
Succinate	STD	14.2829	117.02	117.019	-3.18941	NEG	Low	1.60881	0.265335	1.32956	1.73769	0.136084	0.259098	0.0120211	1.43238	1.8514	0.17775	0.275303	0.0593707
Tetradecanoyl-carnitine	STD	3.65617	372.311	372.311	0.741352	POS	Low	0.492203	1.08207	0.673873	0.408356	0.987893	1.14	0.405449	0.611367	0.328353	0.946325	1.35598	0.244995
Threonine	STD	13.6493	120.065	120.066	2.56928	POS	High	117.188	0.250764	117.171	117.195	0.334785	0.218245	0.998941	113.362	122.447	0.254033	0.255824	0.528712
Trimethyl-histidine (hercynine)	STD	11.3441	198.124	198.124	0.788493	POS	Low	2.58731	0.598385	2.18699	2.77208	0.790834	0.538933	0.493724	2.11958	3.23046	0.656415	0.49738	0.138282
Trimethyl-lysine	STD	22.8304	189.16	189.16	0.79619	POS	Medium	81.1426	0.277195	75.0778	83.9417	0.0971832	0.317386	0.283118	72.7847	92.6347	0.119987	0.329424	0.112457
Trimethyl-tryptophan (hypaphorine)	STD	6.26121	247.144	247.144	-0.0162007	POS	Medium	42.5314	1.22953	71.897	28.978	0.738302	1.65417	0.125862	57.1726	22.3997	1.07319	1.30444	0.121421
Trimethyl-tyrosine	MS/MS	8.0399	224.128	224.128	0.762984	POS	Low	0.131162	1.17532	0.0465029	0.170235	0.801708	1.01456	0.0272086	0.0794424	0.202276	1.4519	0.88602	0.116951
Tryptophan	STD	9.98463	205.097	205.097	0.382604	POS	High	193.824	0.211672	180.569	199.942	0.335514	0.147277	0.484573	186.741	203.563	0.252553	0.152488	0.362208
Tyrosine	STD	12.3493	182.081	182.081	0.951094	POS	High	110.92	0.243824	101.807	115.127	0.28286	0.228318	0.360686	110.722	111.193	0.282502	0.197649	0.969663
UDP	STD	16.4821	402.994	402.995	1.46289	NEG	Low	0.701722	0.447496	0.885738	0.616791	0.574175	0.201183	0.254605	0.764059	0.616008	0.50727	0.253868	0.271363
UDP-glucose	STD	16.2135	565.047	565.048	0.483198	NEG	Medium	36.5958	0.224645	33.3311	38.1026	0.169425	0.235185	0.179707	37.4716	35.3916	0.22158	0.240495	0.602931
UDP-glucuronate	STD	18.6172	579.027	579.027	0.56584	NEG	Low	1.29333	0.425678	1.35653	1.26416	0.355091	0.471348	0.725375	1.32369	1.25158	0.338181	0.559111	0.802726
UDP-N-acetylglucosamine	STD	14.8795	606.074	606.074	0.436177	NEG	Medium	19.7803	0.636138	17.5387	20.8149	0.490201	0.684547	0.544423	16.645	24.0914	0.445327	0.70925	0.277653
UMP	STD	14.7831	323.028	323.029	1.26015	NEG	Medium	31.1814	0.294731	31.9375	30.8325	0.244229	0.325822	0.798223	32.1141	29.8991	0.344428	0.209282	0.587492
Urate	STD	12.6153	167.021	167.021	1.50789	NEG	High	103.369	0.209077	90.9719	109.09	0.197821	0.195183	0.0796129	95.2439	114.54	0.222853	0.153989	0.0457418
Uridine	STD	7.3726	243.062	243.062	1.58454	NEG	Low	4.40541	0.249248	4.72335	4.25867	0.29035	0.228989	0.477827	4.36303	4.4637	0.29968	0.180808	0.83862
UTP	STD	17.5609	482.961	482.961	0.695631	NEG	Low	2.01673	0.198863	1.91334	2.06444	0.131244	0.220481	0.366483	1.94271	2.11851	0.161397	0.237287	0.401312
Valine	STD	11.2828	116.072	116.072	-2.44391	NEG	Medium	15.4837	0.272599	16.7332	14.907	0.370158	0.207818	0.518887	15.7795	15.0769	0.342541	0.128411	0.697323
Xanthine	STD	8.49766	151.026	151.026	-0.315135	NEG	Low	5.20003	1.56631	2.60121	6.39948	0.197781	1.51874	0.185137	5.25266	5.12766	1.73983	1.39634	0.973744
