# Supplementary material for: Reduced uremic metabolites are prominent feature of sarcopenia, distinct from antioxidative markers for frailty
Source: publisher site journal article supplement (doi:10.18632/aging.203498), 2021-09-07
Supplement: Supplementary file [file aging-v13i17-203498-supplementary-material-SD1.pdf]

## SUPPLEMENTARY FIGURES

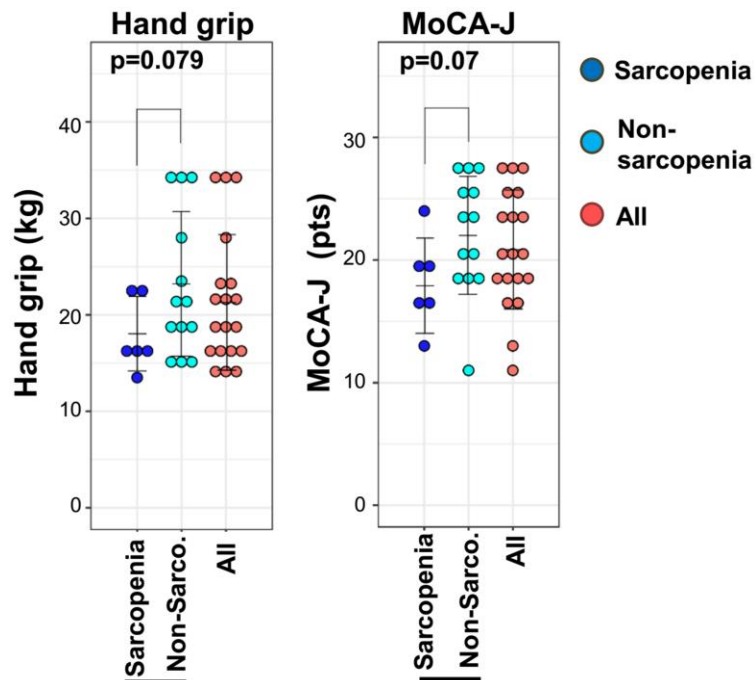

**Supplementary Figure 1. Supplemental clinical data between sarcopenia and non-sarcopenia.** Comparison of handgrip strength (left panel) and MoCA-J (right panel) between sarcopenia and non-sarcopenia were shown.



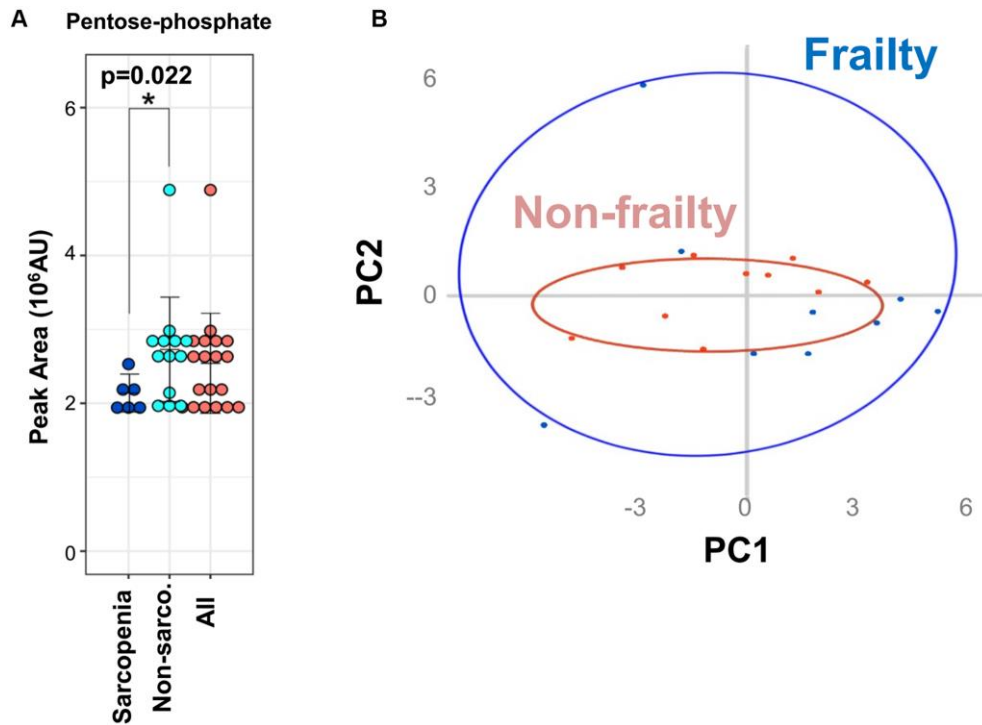

**Supplementary Figure 3. Pentose-phosphates as sarcopenic markers and PCA for frailty using sarcopenia markers. (A)** Pentose-phosphates were significantly decreased in sarcopenia. Error bars represent means  $\pm$  SD. Asterisks indicate significant difference ( $*p < 0.05$ ). **(B)** PCA with 22 sarcopenia markers did not distinguish frailty patients from non-frailty controls.
